# Supplementary material for: The Grp170 nucleotide exchange factor executes a key role during ERAD of cellular misfolded clients
Source: PubMed Central journal article supplement — Mol Biol Cell. 2016 May 15;27(10):1650–62. doi: 10.1091/mbc.E16-01-0033 (PMC4865321; doi:10.1091/mbc.e16-01-0033), 2016-05-15
Supplement: supp_E16-01-0033v1_CombinedSupMats.pdf [file supp_E16-01-0033v1_CombinedSupMats.pdf]

# Supplemental Materials

*Molecular Biology of the Cell*

Inoue et al.

## SUPPLEMENTARY FIGURE

Figure S1. Additional characterization of Grp170's function during ERAD, for Figure 1

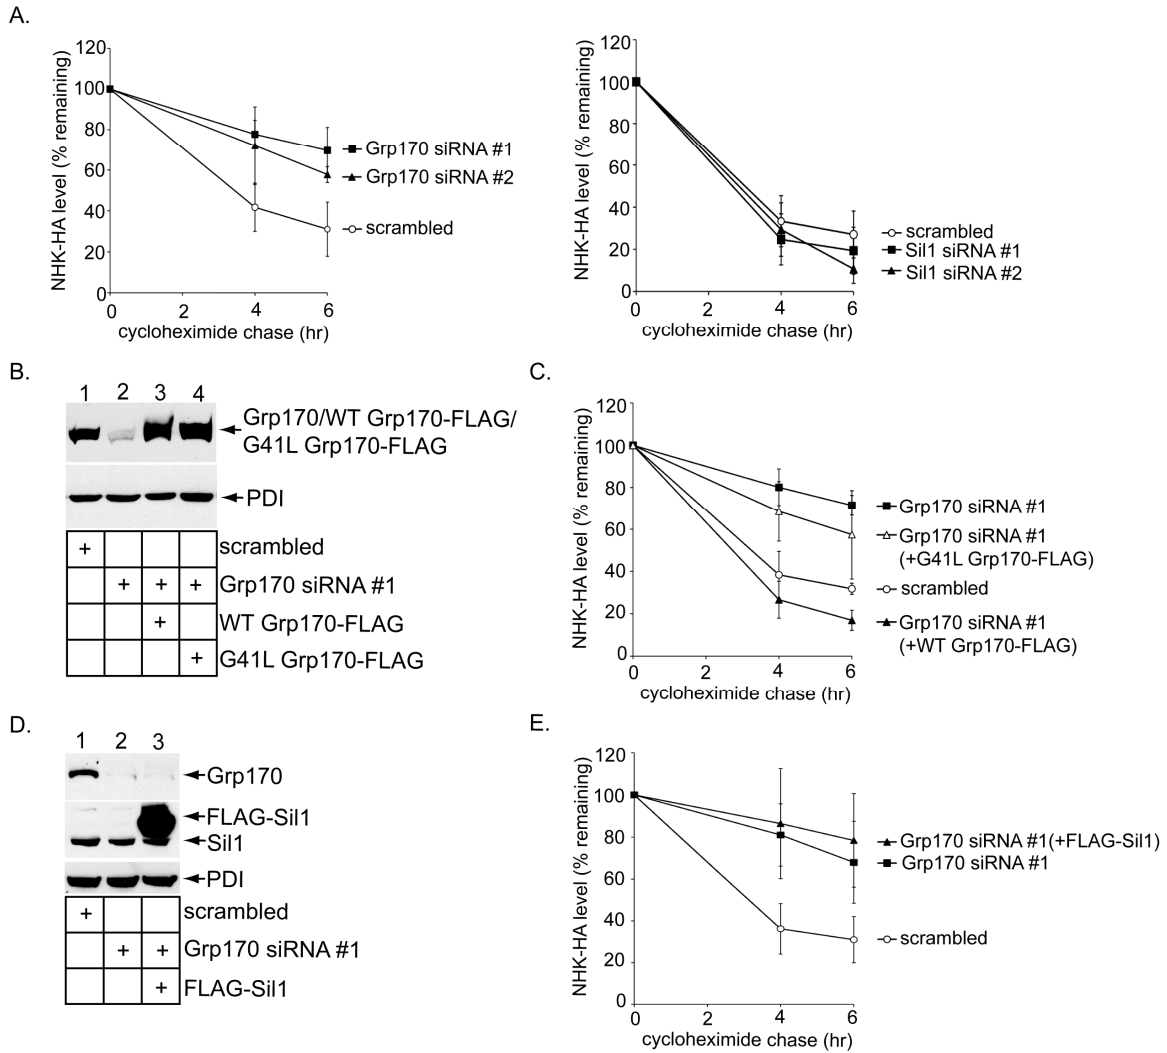

Figure S1. Additional characterization of Grp170's function during ERAD, for Figure 1

(A) The NHK-HA band intensity in Figure 1C (top and bottom panels) was quantified with ImageJ (NIH). Data represent the mean  $\pm$  SD of at least 3 independent experiments. Left and right panels correspond to the top and bottom panels in Figure 1C, respectively.

(B) WCEs derived from Figure 1D (top panel) were analyzed by SDS-PAGE, followed by immunoblotting with the indicated antibodies.

(C) The NHK-HA band intensity in Figure 1D (top panel) was analyzed as in A.

(D) WCEs derived from Figure 1D (bottom panel) were analyzed as in B.

(E) The NHK-HA band intensity in Figure 1D (bottom panel) was analyzed as in A.

Figure S2: Characterization of the G41L Grp170-Sel1L complex, for Figure 3

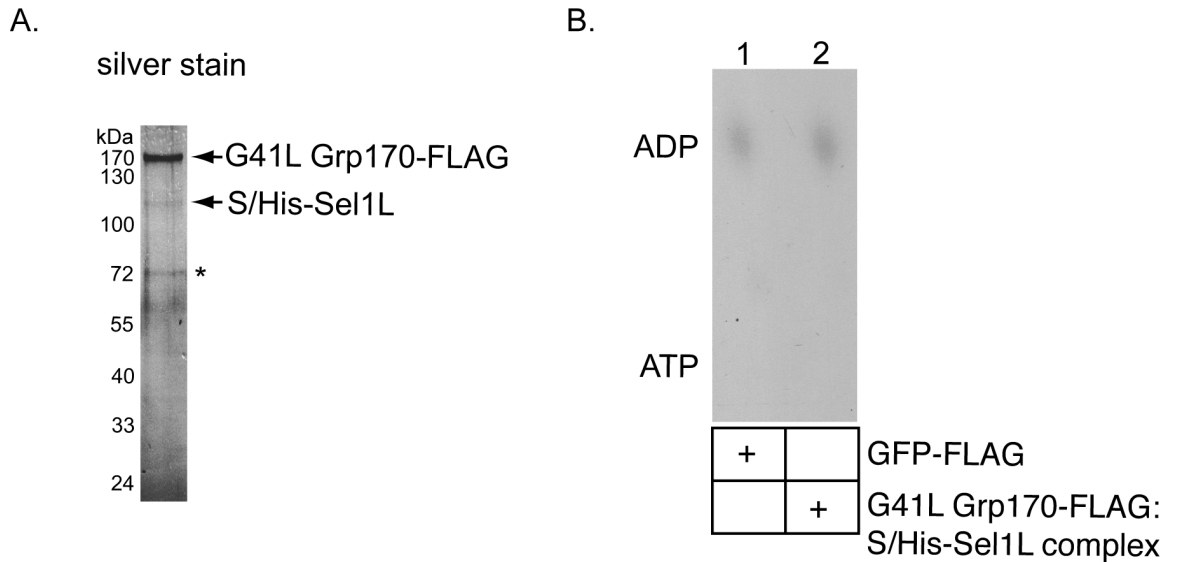

Figure S2. Characterization of the G41L Grp170-FLAG:S/His-Sel1L complex, for Figure 3

(A) Silver stain of the G41L Grp170-FLAG:S/His-Sel1L complex. \*denotes degraded G41L Grp170-FLAG or contaminated proteins.

(F) As in Figure 3F, except that the G41L Grp170-FLAG:S/His-Sel1L complex was used.
